# Supplementary material for: Spatial distribution of active sites on a ferroelectric PbTiO3 photocatalyst for photocatalytic hydrogen production
Source: Royal Society of Chemistry journal article supplement (doi:10.1039/c6fd00199h), 2016-12-06
Supplement: c6fd00199h1.pdf [file c6fd00199h1.pdf]

**Spatial distribution of active sites on ferroelectric PbTiO<sub>3</sub> photocatalyst for  
photocatalytic hydrogen production**

Rengui Li<sup>\*a</sup>, Yue Zhao<sup>a,b</sup> and Can Li<sup>\*a</sup>

a. State Key Laboratory of Catalysis, Dalian Institute of Chemical Physics, Chinese Academy of Sciences, Dalian National Laboratory for Clean Energy, the Collaborative Innovation Center of Chemistry for Energy Materials, Dalian 116023, Liaoning, China.

b. University of Chinese Academy of Sciences, Beijing 100049, China.

Corresponding author: [rgli@dicp.ac.cn](mailto:rgli@dicp.ac.cn) or [canli@dicp.ac.cn](mailto:canli@dicp.ac.cn) .

## **1. Sample preparation.**

PbTiO<sub>3</sub> photocatalyst was synthesized by a traditional solid-state-reaction process. Commercial PbO<sub>2</sub> and TiO<sub>2</sub> powders (2.0 mmol) were mixed together and grinded in the mortar for 30 min, and then transferred to corundum crucible and put in a muffle furnace for calcination at 1273 K for 6 h. The photo-reduction deposition of the Pt (Au) was achieved with H<sub>2</sub>PtCl<sub>6</sub> (HAuCl<sub>4</sub>) as the precursor. In a typical procedure, 200 mg PbTiO<sub>3</sub> sample was suspended in 150 mL deionized water. Then H<sub>2</sub>PtCl<sub>6</sub> solution and 5 ml CH<sub>3</sub>OH were added and the suspension was then irradiated by a 300 W Xe lamp (Ushio-CERMAXLX300) under a constant stirring. After reaction for 2 h, the suspension was centrifuged five times in deionized water and anhydrous ethanol, respectively, and dried at 70 °C for 12 h in a vacuum oven. The photo-oxidation deposition of the MnO<sub>x</sub> was achieved with MnSO<sub>4</sub> as the precursor, and NaIO<sub>3</sub> was employed as the electron acceptor. In a typical procedure, 200 mg PbTiO<sub>3</sub> sample was suspended in 150 mL deionized water containing 0.20g NaIO<sub>3</sub>. Then MnSO<sub>4</sub> solution was added and the suspension was irradiated by a 300 W Xe lamp (Ushio-CERMAXLX300) under a constant stirring. After photo-deposition for 2 h, the suspension was centrifuged five times in deionized water and anhydrous ethanol, respectively, and dried at 70 °C for 12 h in a vacuum oven.

## **2. Evaluation of photocatalytic hydrogen production.**

Photocatalytic H<sub>2</sub> production reaction were carried out in a closed gas circulation and evacuation system using a 300 W Xe lamp (Ushio-CERMAXLX300). Normally, 100 mg photocatalyst was dispersed in 150 mL CH<sub>3</sub>OH-H<sub>2</sub>O (20% CH<sub>3</sub>OH) solution in a Pyrex reaction cell. Before irradiation, the reaction system was thoroughly degassed by evacuation in order to drive off the air inside. The amount of evolved H<sub>2</sub> was determined by an on-line gas chromatograph (Agilent, GC-

7890, TCD, Ar carrier). The amount of Pt or/and MnO<sub>x</sub> cocatalysts were 0.1 wt% for the evaluation of photocatalytic performance.

### **3. Characterizations**

The as-prepared samples were characterized by X-ray power diffraction (XRD) on a Rigaku D/Max-2500/PC powder diffractometer. The sample power was scanned using Cu-K $\alpha$  radiation with an operating voltage of 40 kV and current of 200 mA. The scan rate of 5°/min was applied to record the patterns in the range of 20-80° at a step size of 0.02°. UV-visible (UV-vis) diffuse reflectance spectra were recorded on a UV-vis spectrophotometer (JASCO V-650) equipped with an integrating sphere. The morphologies of photocatalysts were examined by scanning electron microscopy (SEM) taken with a Quanta 200 FEG scanning electron microscope with an operating voltage of 20.0 kV.

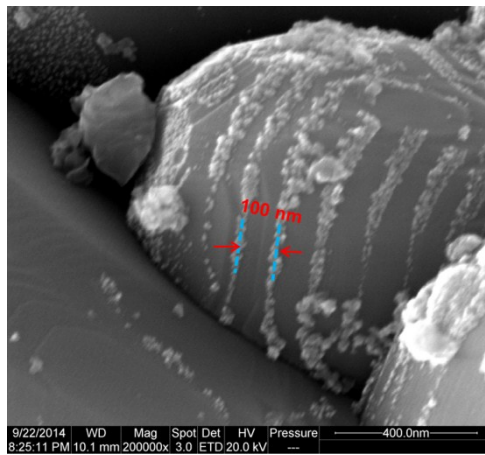

**Figure S1.** SEM image of photo-reduction deposition of Au nanoparticles on as-prepared  $\text{PbTiO}_3$  photocatalyst.

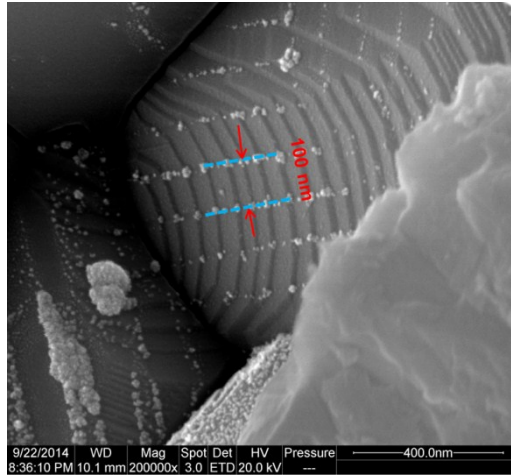

**Figure S2.** SEM image of photo-reduction deposition of Pt nanoparticles on PbTiO<sub>3</sub> crystals with step-like structure on the surface.
